# Supplementary material
Source: PubMed Central journal article supplement (PMC11579999)
Supplement: sj-pdf-1-jrn-10.1177_17449871241278854.pdf [file sj-pdf-1-jrn-10.1177_17449871241278854.pdf]

## Annexure-I

### Demographic Variables

**Note:** Please encircle the appropriate option

|                                                                                                                        |
|------------------------------------------------------------------------------------------------------------------------|
| <b>Age in years:</b><br>a) 17-21<br>b) 22 and older                                                                    |
| <b>Gender:</b><br>a) Female<br>b) Male                                                                                 |
| <b>Year of Study:</b><br>a) 3 <sup>rd</sup> year<br>b) 4 <sup>th</sup> year                                            |
| <b>Family Structure:</b><br>a) Nuclear<br>b) Extended                                                                  |
| <b>Educational level of Mother:</b><br>a) Illiterate<br>b) Primary School<br>c) Secondary School<br>d) High School     |
| <b>Educational level of Father:</b><br>a) Illiterate<br>b) Primary School<br>c) Secondary School<br>d) High School     |
| <b>No. of Siblings:</b><br>a) 2 siblings or less<br>b) 03 siblings<br>c) 04 siblings or more                           |
| <b>Monthly income:</b><br>a) Expenses more than income<br>b) Equal Income and Expenses<br>c) Income more than Expenses |
| <b>Attitude of Parent</b><br>a) Authoritative<br>b) Democratic<br>c) Unconcerned                                       |

## Annexure-II

### Connor-Davidson Resilience Scale 25 (CD-RISC-25) ©

For each item, please mark an "x" in the box below that best indicates how much you agree with the following statements as they apply to you over the last month. If a particular situation has not occurred recently, answer according to how you think you would have felt.

|                                                                                                      | not true<br>at all<br>(0) | rarely<br>true<br>(1)    | sometimes<br>true<br>(2) | often<br>true<br>(3)     | true nearly<br>all the time<br>(4) |
|------------------------------------------------------------------------------------------------------|---------------------------|--------------------------|--------------------------|--------------------------|------------------------------------|
| 1. I am able to adapt when changes occur.                                                            | <input type="checkbox"/>  | <input type="checkbox"/> | <input type="checkbox"/> | <input type="checkbox"/> | <input type="checkbox"/>           |
| 2. I have at least one close and secure relationship that helps me when I am stressed.               | <input type="checkbox"/>  | <input type="checkbox"/> | <input type="checkbox"/> | <input type="checkbox"/> | <input type="checkbox"/>           |
| 3. When there are no clear solutions to my problems, sometimes fate or God can help.                 | <input type="checkbox"/>  | <input type="checkbox"/> | <input type="checkbox"/> | <input type="checkbox"/> | <input type="checkbox"/>           |
| 4. I can deal with whatever comes my way.                                                            | <input type="checkbox"/>  | <input type="checkbox"/> | <input type="checkbox"/> | <input type="checkbox"/> | <input type="checkbox"/>           |
| 5. Past successes give me confidence in dealing with new challenges and difficulties.                | <input type="checkbox"/>  | <input type="checkbox"/> | <input type="checkbox"/> | <input type="checkbox"/> | <input type="checkbox"/>           |
| 6. I try to see the humorous side of things when I am faced with problems.                           | <input type="checkbox"/>  | <input type="checkbox"/> | <input type="checkbox"/> | <input type="checkbox"/> | <input type="checkbox"/>           |
| 7. Having to cope with stress can make me stronger.                                                  | <input type="checkbox"/>  | <input type="checkbox"/> | <input type="checkbox"/> | <input type="checkbox"/> | <input type="checkbox"/>           |
| 8. I tend to bounce back after illness, injury, or other hardships.                                  | <input type="checkbox"/>  | <input type="checkbox"/> | <input type="checkbox"/> | <input type="checkbox"/> | <input type="checkbox"/>           |
| 9. Good or bad, I believe that most things happen for a reason.                                      | <input type="checkbox"/>  | <input type="checkbox"/> | <input type="checkbox"/> | <input type="checkbox"/> | <input type="checkbox"/>           |
| 10. I give my best effort no matter what the outcome may be.                                         | <input type="checkbox"/>  | <input type="checkbox"/> | <input type="checkbox"/> | <input type="checkbox"/> | <input type="checkbox"/>           |
| 11. I believe I can achieve my goals, even if there are obstacles.                                   | <input type="checkbox"/>  | <input type="checkbox"/> | <input type="checkbox"/> | <input type="checkbox"/> | <input type="checkbox"/>           |
| 12. Even when things look hopeless, I don't give up.                                                 | <input type="checkbox"/>  | <input type="checkbox"/> | <input type="checkbox"/> | <input type="checkbox"/> | <input type="checkbox"/>           |
| 13. During times of stress/crisis, I know where to turn for help.                                    | <input type="checkbox"/>  | <input type="checkbox"/> | <input type="checkbox"/> | <input type="checkbox"/> | <input type="checkbox"/>           |
| 14. Under pressure, I stay focused and think clearly.                                                | <input type="checkbox"/>  | <input type="checkbox"/> | <input type="checkbox"/> | <input type="checkbox"/> | <input type="checkbox"/>           |
| 15. I prefer to take the lead in solving problems rather than letting others make all the decisions. | <input type="checkbox"/>  | <input type="checkbox"/> | <input type="checkbox"/> | <input type="checkbox"/> | <input type="checkbox"/>           |
| 16. I am not easily discouraged by failure.                                                          | <input type="checkbox"/>  | <input type="checkbox"/> | <input type="checkbox"/> | <input type="checkbox"/> | <input type="checkbox"/>           |
| 17. I think of myself as a strong person when dealing with life's challenges and difficulties.       | <input type="checkbox"/>  | <input type="checkbox"/> | <input type="checkbox"/> | <input type="checkbox"/> | <input type="checkbox"/>           |
| 18. I can make unpopular or difficult decisions that affect other people, if it is necessary.        | <input type="checkbox"/>  | <input type="checkbox"/> | <input type="checkbox"/> | <input type="checkbox"/> | <input type="checkbox"/>           |
| 19. I am able to handle unpleasant or painful feelings like sadness, fear, and anger.                | <input type="checkbox"/>  | <input type="checkbox"/> | <input type="checkbox"/> | <input type="checkbox"/> | <input type="checkbox"/>           |
| 20. In dealing with life's problems, sometimes you have to act on a hunch without knowing why.       | <input type="checkbox"/>  | <input type="checkbox"/> | <input type="checkbox"/> | <input type="checkbox"/> | <input type="checkbox"/>           |
| 21. I have a strong sense of purpose in life.                                                        | <input type="checkbox"/>  | <input type="checkbox"/> | <input type="checkbox"/> | <input type="checkbox"/> | <input type="checkbox"/>           |
| 22. I feel in control of my life.                                                                    | <input type="checkbox"/>  | <input type="checkbox"/> | <input type="checkbox"/> | <input type="checkbox"/> | <input type="checkbox"/>           |
| 23. I like challenges.                                                                               | <input type="checkbox"/>  | <input type="checkbox"/> | <input type="checkbox"/> | <input type="checkbox"/> | <input type="checkbox"/>           |
| 24. I work to attain my goals no matter what roadblocks I encounter along the way.                   | <input type="checkbox"/>  | <input type="checkbox"/> | <input type="checkbox"/> | <input type="checkbox"/> | <input type="checkbox"/>           |
| 25. I take pride in my achievements.                                                                 | <input type="checkbox"/>  | <input type="checkbox"/> | <input type="checkbox"/> | <input type="checkbox"/> | <input type="checkbox"/>           |

Add up your score for each column      0 + \_\_\_\_\_ + \_\_\_\_\_ + \_\_\_\_\_ + \_\_\_\_\_

Add each of the column totals to obtain CD-RISC score      = \_\_\_\_\_

All rights reserved. No part of this document may be reproduced or transmitted in any form without permission in writing from Dr. Davidson at [mail@cd-risc.com](mailto:mail@cd-risc.com). Copyright © 2001, 2018 by Kathryn M. Connor, M.D., and Jonathan R.T. Davidson, M.D.

## Annexure-III

### Multidimensional Scale of Perceived Social Support

Instructions: We are interested in how you feel about the following statements. Read each statement carefully. Indicate how you feel about each statement.

Circle the "1" if you **Very Strongly Disagree**  
Circle the "2" if you **Strongly Disagree**  
Circle the "3" if you **Mildly Disagree**  
Circle the "4" if you are **Neutral**  
Circle the "5" if you **Mildly Agree**  
Circle the "6" if you **Strongly Agree**  
Circle the "7" if you **Very Strongly Agree**

|                                                                       | Very<br>Strongly<br>Disagree | Strongly<br>Disagree | Mildly<br>Disagree | Neutral | Mildly<br>Agree | Strongly<br>Agree | Very<br>Strongly<br>Agree |
|-----------------------------------------------------------------------|------------------------------|----------------------|--------------------|---------|-----------------|-------------------|---------------------------|
| 1. There is a special person who is around when I am in need.         | 1                            | 2                    | 3                  | 4       | 5               | 6                 | 7                         |
| 2. There is a special person with whom I can share joys and sorrows.  | 1                            | 2                    | 3                  | 4       | 5               | 6                 | 7                         |
| 3. My family really tries to help me.                                 | 1                            | 2                    | 3                  | 4       | 5               | 6                 | 7                         |
| 4. I get the emotional help & support I need from my family.          | 1                            | 2                    | 3                  | 4       | 5               | 6                 | 7                         |
| 5. I have a special person who is a real source of comfort to me.     | 1                            | 2                    | 3                  | 4       | 5               | 6                 | 7                         |
| 6. My friends really try to help me.                                  | 1                            | 2                    | 3                  | 4       | 5               | 6                 | 7                         |
| 7. I can count on my friends when things go wrong.                    | 1                            | 2                    | 3                  | 4       | 5               | 6                 | 7                         |
| 8. I can talk about my problems with my family.                       | 1                            | 2                    | 3                  | 4       | 5               | 6                 | 7                         |
| 9. I have friends with whom I can share my joys and sorrows.          | 1                            | 2                    | 3                  | 4       | 5               | 6                 | 7                         |
| 10. There is a special person in my life who cares about my feelings. | 1                            | 2                    | 3                  | 4       | 5               | 6                 | 7                         |
| 11. My family is willing to help me make decisions.                   | 1                            | 2                    | 3                  | 4       | 5               | 6                 | 7                         |
| 12. I can talk about my problems with my friends.                     | 1                            | 2                    | 3                  | 4       | 5               | 6                 | 7                         |

Scale Reference:

Zimet GD, Dahlem NW, Zimet SG, Farley GK. The Multidimensional Scale of Perceived Social Support. *Journal of Personality Assessment* 1988;52:30-41.

Scoring Information:

To calculate mean scores:

Significant Other Subscale: Sum across items 1, 2, 5, & 10, then divide by 4.

Family Subscale: Sum across items 3, 4, 8, & 11, then divide by 4.

Friends Subscale: Sum across items 6, 7, 9, & 12, then divide by 4.

Total Scale: Sum across all 12 items, then divide by 12.

More information at:

<http://qzimet.wix.com/msspss>

Other MSPSS Scoring Options:

There are no established population norms on the MSPSS. Also, norms would likely vary on the basis of culture and nationality, as well as age and gender. I have typically looked at how social support differs between groups (e.g., married compared to unmarried individuals) or is associated with other measures (e.g., depression or anxiety). With these approaches you can use the mean scale scores.

If you want to divide your respondents into groups on the basis of MSPSS scores there are at least two ways you can approach this process:

1. You can divide your respondents into 3 equal groups on the basis of their scores (trichotomize) and designate the lowest group as low perceived support, the middle group as medium support, and the high group as high support. This approach ensures that you have about the same number of respondents in each group. But, if the distribution of scores is skewed, your low support group, for example, may include respondents who report moderate or even relatively high levels of support.
2. Alternatively, you can use the scale response descriptors as a guide. In this approach any mean scale score ranging from 1 to 2.9 could be considered low support; a score of 3 to 5 could be considered moderate support; a score from 5.1 to 7 could be considered high support. This approach would seem to have more validity, but if you have very few respondents in any of the groups, it could be problematic.

## Annexure-IV

### Interpretation:

It is recommended to administer the Major Depression (ICD-10) Inventory if the raw score is below 13 or if the patient has answered 0 to 1 to any of the five items. A score below 13 indicates poor wellbeing and is an indication for testing for depression under ICD-10.

### Monitoring change:

In order to monitor possible changes in wellbeing, the percentage score is used. A 10% difference indicates a significant change (ref. John Ware, 1995).

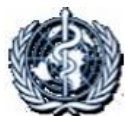

### WHO (Five) Well-Being Index (1998 version)

Please indicate for each of the five statements which is closest to how you have been feeling over the last two weeks. Notice that higher numbers mean better well-being.

Example: If you have felt cheerful and in good spirits more than half of the time during the last two weeks, put a tick in the box with the number 3 in the upper right corner.

|          | <i>Over the last two weeks</i>                                    | All of the time            | Most of the time           | More than half of the time | Less than half of the time | Some of the time           | At no time                 |
|----------|-------------------------------------------------------------------|----------------------------|----------------------------|----------------------------|----------------------------|----------------------------|----------------------------|
| <b>1</b> | <b>I have felt cheerful and in good spirits</b>                   | <input type="checkbox"/> 5 | <input type="checkbox"/> 4 | <input type="checkbox"/> 3 | <input type="checkbox"/> 2 | <input type="checkbox"/> 1 | <input type="checkbox"/> 0 |
| <b>2</b> | <b>I have felt calm and relaxed</b>                               | <input type="checkbox"/> 5 | <input type="checkbox"/> 4 | <input type="checkbox"/> 3 | <input type="checkbox"/> 2 | <input type="checkbox"/> 1 | <input type="checkbox"/> 0 |
| <b>3</b> | <b>I have felt active and vigorous</b>                            | <input type="checkbox"/> 5 | <input type="checkbox"/> 4 | <input type="checkbox"/> 3 | <input type="checkbox"/> 2 | <input type="checkbox"/> 1 | <input type="checkbox"/> 0 |
| <b>4</b> | <b>I woke up feeling fresh and rested</b>                         | <input type="checkbox"/> 5 | <input type="checkbox"/> 4 | <input type="checkbox"/> 3 | <input type="checkbox"/> 2 | <input type="checkbox"/> 1 | <input type="checkbox"/> 0 |
| <b>5</b> | <b>My daily life has been filled with things that interest me</b> | <input type="checkbox"/> 5 | <input type="checkbox"/> 4 | <input type="checkbox"/> 3 | <input type="checkbox"/> 2 | <input type="checkbox"/> 1 | <input type="checkbox"/> 0 |

#### Scoring:

The raw score is calculated by totalling the figures of the five answers. The raw score ranges from 0 to 25, 0 representing worst possible and 25 representing best possible quality of life.

To obtain a percentage score ranging from 0 to 100, the raw score is multiplied by 4. A percentage score of 0 represents worst possible, whereas a score of 100 represents best possible quality of life.
